# Supplementary material for: Self-powered UV-visible photodetector with fast response and high photosensitivity employing an Fe:TiO2/n-Si heterojunction
Source: Royal Society of Chemistry journal article supplement (doi:10.1039/c7ra10439a), 2017-01-01
Supplement: c7ra10439a1.pdf [file c7ra10439a1.pdf]

## Electronic Supplementary Information (ESI)

### Self-powered UV-Visible Photodetector with Fast Response and High Photosensitivity Employing Fe:TiO<sub>2</sub>/n-Si Heterojunction

Lin Sun,<sup>a</sup> Chunrui Wang,<sup>\*a</sup> Tao Ji,<sup>ab</sup> Jiale Wang,<sup>a</sup> Gyu-Chul Yi<sup>c</sup> and Xiaoshuang Chen<sup>ad</sup>

**a.** Department of Applied Physics and state key laboratory for modification of chemical fibers and polymer materials, Donghua University, 2999 Renmin Rd North, Songjiang District, Shanghai, P.R.China. Email: crwang@dhu.edu.cn.

**b.** School of Fundamental Studies, Shanghai University of Engineering Science, 333 Long Teng Road, Songjiang District, Shanghai, P.R.China.

**c.** Department of Physics and Astronomy, Seoul National University, Seoul 151-747, Korea. E-mail: gcyi@snu.ac.kr

**d.** National Laboratory for Infrared Physics, Shanghai Institute of Technical Physics, Chinese Academy of Science, Shanghai 200083, P.R.China. E-mail: xschen@mail.istp.ac.cn

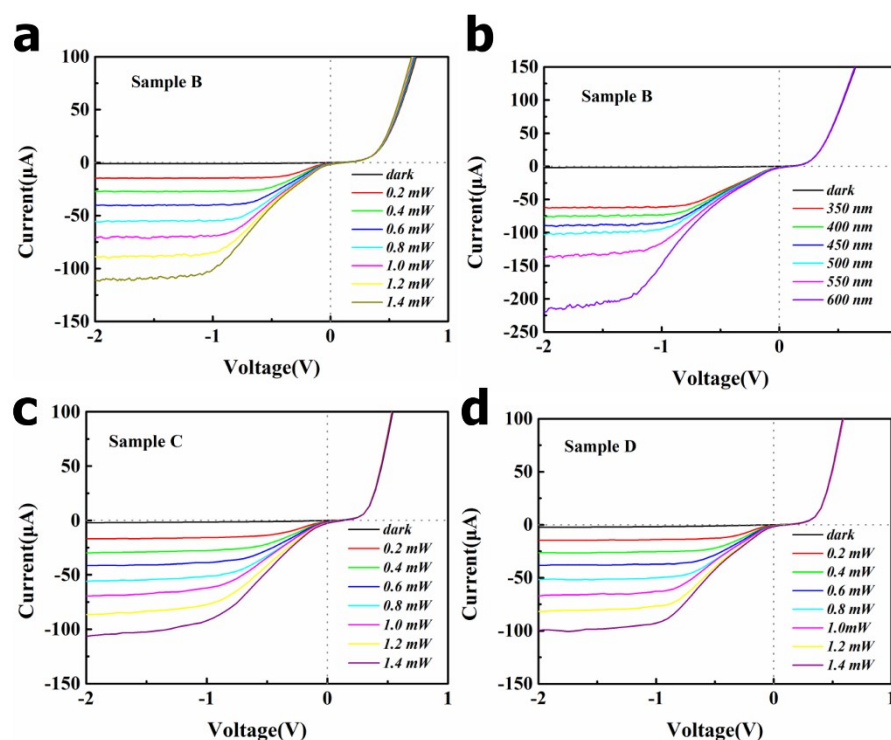

**Fig. S1** Photoreponse of Sample B, C and D with the device area = 0.25 cm<sup>2</sup>. (a, c, d) *I-V*

characteristics of the heterojunction photodetector under various incident light power. (b) Photocurrent characteristics of Sample B with the wavelength of the incident radiation from 350 to 600 nm at a constant intensity of  $0.5 \text{ mW}\cdot\text{cm}^{-2}$ .

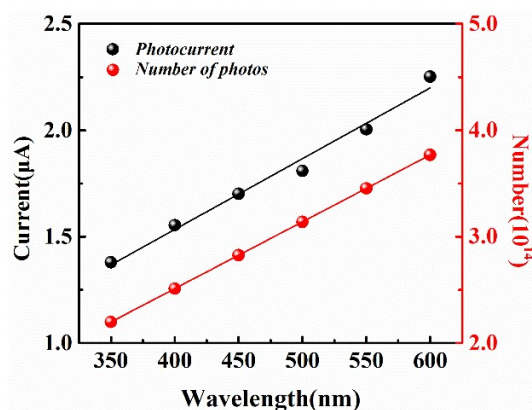

**Fig. S2** Photocurrent and number of photons of the device for different wavelength of light and the linear correlation coefficient ( $R^2$ ) of curve is 0.99. The number of photons with different wavelength was obtained according to the formula  $P \cdot S = N \cdot h \cdot c / \lambda$ , where the  $P$ ,  $S$ ,  $N$ ,  $h$ ,  $c$ ,  $\lambda$  are the light power density, the effective area under irradiation, the number of incident photons, Planck's constant, the velocity of light, and the wavelength of illuminated light, respectively.<sup>1</sup>

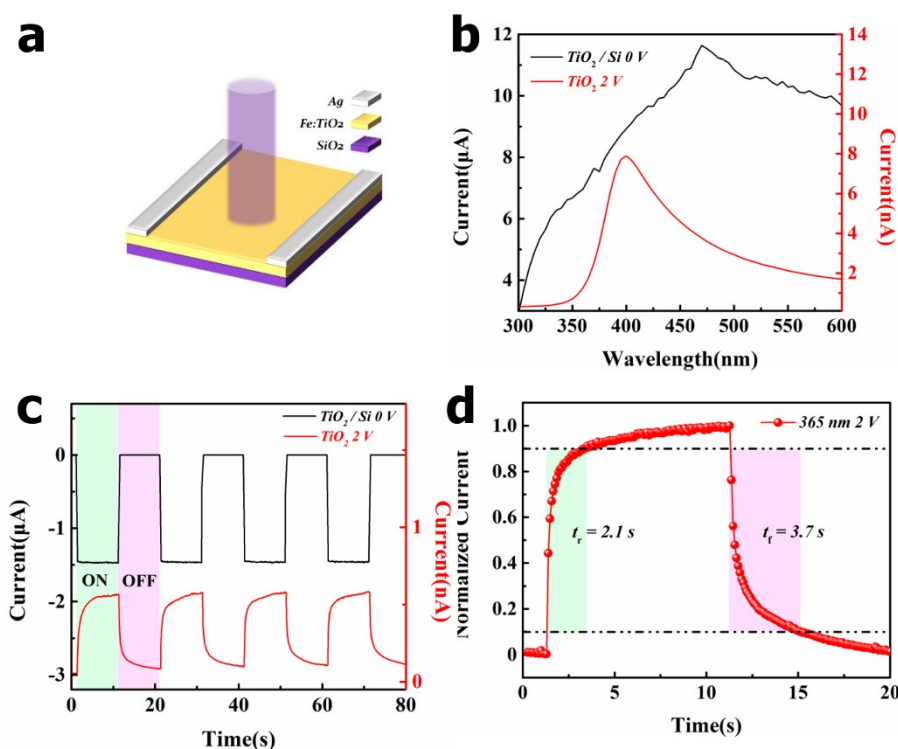

**Fig. S3** Comparison of photoresponse of TiO<sub>2</sub>/Si heterojunction device and TiO<sub>2</sub> thin film device. (a) Spectral response of TiO<sub>2</sub>/Si heterojunction device and TiO<sub>2</sub> thin film device (The inset is Schematic diagram of TiO<sub>2</sub> thin film device). (b) Photocurrent switching behaviors obtained from TiO<sub>2</sub>/Si heterojunction device and TiO<sub>2</sub> thin film device with the wavelength of

365 nm at a intensity of  $1.0 \text{ mW}\cdot\text{cm}^{-2}$ . (c) One cycle of photoswitching photocurrent for  $\text{TiO}_2$  thin film device at 2 V bias with a light of 365 nm.

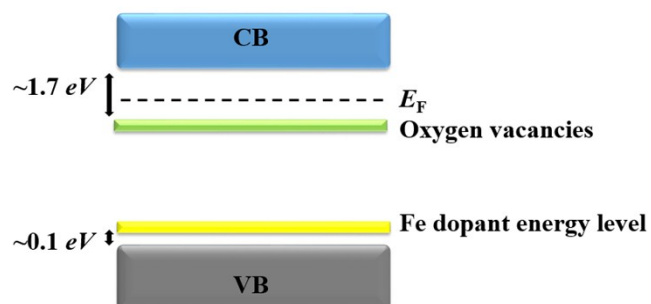

**Fig. S4** Schematic diagram of the electronic band structure for the anatase Fe-doped  $\text{TiO}_2$ .<sup>2,3</sup>

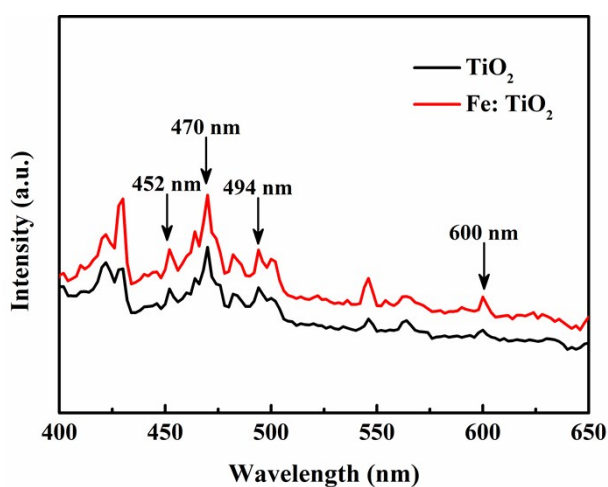

**Fig. S5** Photoluminescence spectra of pure  $\text{TiO}_2$  film and Fe-doped  $\text{TiO}_2$  film.

## References

- 1 G. Li, L. Liu, G. Wu, W. Chen, S. Qin, Y. Wang and T. Zhang, *Small*, 2016, **12**, 5019-5026.
- 2 J. Zhang, X. Chen, Y. Shen, Y. Li, Z. Hu and J. Chu, *Physical chemistry chemical physics : PCCP*, 2011, **13**, 13096-13105.
- 3 C.-C. Wang, K.-W. Wang and T.-P. Perng, *Applied Physics Letters*, 2010, **96**, 143102.
